# Supplementary material
Source: PubMed Central journal article supplement (PMC7440876)
Supplement: mmc1.pdf [file mmc1.pdf]

# THE LANCET

## Supplementary appendix

This appendix formed part of the original submission. We post it as supplied by the authors.

Supplement to: Brainin M, on behalf of the World Stroke Organization, Sliwa K, on behalf of the World Heart Federation. WSO and WHF joint position statement on population-wide prevention strategies. *Lancet* 2020; **396**: 533–34.

1. Seminog OO, Scarborough P, Wright FL, Rayner M, Goldacre MJ. Determinants of the decline in mortality from acute stroke in England: linked national database study of 795 869 adults. *BMJ* 2019;365:l1778.
2. Vaartjes IP, O'Flaherty MPMD, Capewell SPMD, Kappelle JPMD, Bots MPMD. Remarkable Decline in Ischemic Stroke Mortality Is not Matched by Changes in Incidence. *Stroke*.
3. Xu JQ, Murphy SL, Kochanek KD, Arias E. Mortality in the United States, 2015. NCHS data brief, no 267. Hyattsville, MD: National Center for Health Statistics. 2016.
4. Feigin VL, Krishnamurthi RV, Barker-Collo S, et al. 30-Year Trends in Stroke Rates and Outcome in Auckland, New Zealand (1981-2012): A Multi-Ethnic Population-Based Series of Studies. *PLoS One* 2015;10:e0134609.
5. Wallach-Kildemoes H, Diderichsen F, Krasnik A, Lange T, Andersen M. Is the high-risk strategy to prevent cardiovascular disease equitable? A pharmacoepidemiological cohort study. *BMC Public Health* 2012;12:610.
6. Capewell S, Graham H. Will cardiovascular disease prevention widen health inequalities? *PLoS Med* 2010;7:e1000320.
7. O'Donnell MJ, Chin SL, Rangarajan S, et al. Global and regional effects of potentially modifiable risk factors associated with acute stroke in 32 countries (INTERSTROKE): a case-control study. *Lancet* 2016;388:761-775.
8. Yusuf S, Hawken S, Ounpuu S, et al. Effect of potentially modifiable risk factors associated with myocardial infarction in 52 countries (the INTERHEART study): case-control study. *Lancet* 2004;364:937-952.
9. Feigin VL, Roth GA, Naghavi M, et al. Global burden of stroke and risk factors in 188 countries, during 1990-2013: a systematic analysis for the Global Burden of Disease Study 2013. *The Lancet Neurology* 2016;15:913-924.
10. Schwalm JD, McKee M, Huffman Mark D, Yusuf S. Resource Effective Strategies to Prevent and Treat Cardiovascular Disease. *Circulation* 2016;133:742-755.
11. Markus HS, Brainin M. COVID-19 and stroke-A global World Stroke Organization perspective. *International journal of stroke : official journal of the International Stroke Society* 2020;15:361-364.
12. Thienemann F, Pinto F, Grobbee DE, et al. World Heart Federation Briefing on Prevention: Coronavirus Disease 2019 (COVID-19) in Low-Income Countries. *Global heart* 2020;15:31.
13. Kluge HHP, Wickramasinghe K, Rippin HL, et al. Prevention and control of non-communicable diseases in the COVID-19 response. *Lancet* 2020;395:1678-1680.
